# Supplementary material
Source: ML conference proceedings conference paper supplement (https://openaccess.thecvf.com/content/CVPR2024/html/Bandyopadhyay_Doodle_Your_3D_CVPR_2024_paper.html)
Supplement: Supplementary file 1 [file Bandyopadhyay_Doodle_Your_3D_CVPR_2024_supplemental.pdf]

# Supplementary Material

## Doodle Your 3D: From *Abstract Freehand Sketches* to *Precise 3D Shapes*

Hmrishav Bandyopadhyay<sup>1</sup> Subhadeep Koley<sup>1,2</sup> Ayan Das<sup>1</sup> Ayan Kumar Bhunia<sup>1</sup>  
 Aneeshan Sain<sup>1</sup> Pinaki Nath Chowdhury<sup>1</sup> Tao Xiang<sup>1,2</sup> Yi-Zhe Song<sup>1,2</sup>

<sup>1</sup>SketchX, CVSSP, University of Surrey, United Kingdom.

<sup>2</sup>iFlyTek-Surrey Joint Research Centre on Artificial Intelligence.

{h.bandyopadhyay, s.koley, a.das, a.bhunia, a.sain, p.chowdhury, y.song}@surrey.ac.uk

**Segmenting Hand-Drawn Sketches** We demonstrate the generalisation of sketch-based shape generation to hand-drawn sketches after being trained on synthetic sketches only (Fig. 6). To further explore this generalisation, we include qualitative results from our auxiliary segmentation task on hand-drawn sketches from the AmateurSketch-3D dataset [2] in Fig. S1. We note that despite being trained on synthetic sketches, we can generalise and segment hand-drawn sketches fairly accurately.

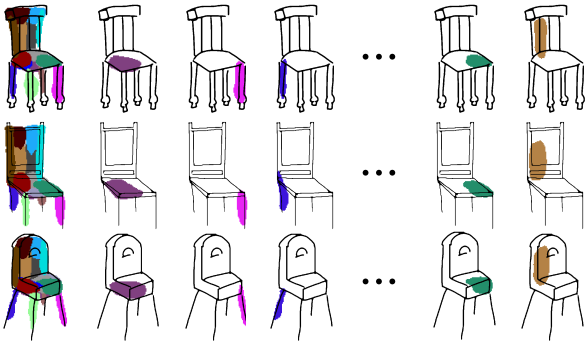

Figure S1. Segmentation results (right) with predicted semantic segmentation map for all 16 parts (left).

**Further Details on Shape Decomposition** Here, we clarify Sec. 3.2, elaborating on the decomposition of shapes (as meshes) into part-latents  $Z$ . To represent a ground truth shape  $M$  with decoder  $\mathcal{D}$ , (i) the ground-truth occupancy values for coordinates  $X = (x, y, z)$  in and around the shape are recorded along with the coordinates themselves. (ii) The decoder  $\mathcal{D}$  is trained to decode a randomly initialised part-latent  $Z$  to an implicit code as  $I = \mathcal{D}(Z)$ . (iii) Finally  $I$  is used in implicit function  $f_\theta$  to *predict* occupancy values for known coordinates  $X$ , as  $O_I = f_\theta(I, X)$ . During pre-training,  $\mathcal{D}$ ,  $Z$ , and  $f_\theta$  are optimized together with binary cross entropy loss ( $\mathcal{L}_{BCE}$ ) against the recorded (ground truth) occupancy values.

The decomposition of shape  $M$  occurs through its representation as part-latent  $Z \in \mathbb{R}^{m \times d}$  using the decoder  $\mathcal{D}$ . Ideally, after disentanglement each latent code  $\omega_i$  in part-latent  $Z = \{\omega_i\}_{i=1}^m$ , sufficiently and independently represents individual components of shape  $M$ , thus successfully breaking down  $M$  into  $m$  parts represented as  $\{\omega_i\}_{i=1}^m$ . This disentanglement of part-latents is necessary for independent representation of shape parts. However,  $\mathcal{L}_{BCE}$  is not enough for this disentanglement, as it only encourages

the final output shape to match shape  $M$ , thus ignoring *part-level* correspondence.

To optimize for disentanglement, part-latent  $Z$  is projected to part structural representation  $Z \rightarrow Z_p$  and part volumetric descriptor  $Z \rightarrow Z_g$ . Particularly important for this representation, each part’s volumetric descriptor is a parametric 3D Gaussian that captures the probability of a 3D coordinate  $X$  belonging to that part. This establishes a relationship between coordinates in the 3D space and part-latent  $Z$ , thereby representing the volume of each part in 3D. For decomposition and disentanglement respectively, this relation of part and 3D coordinates is pivotal for (i) dissipating 3D Gaussians  $Z_g$  over the entire shape volume ( $M$ ) and (ii) specifically disentangling overlapped, or closely-placed parts (as information is commonly entangled here [1]), by computing distance between part-Gaussians in 3D.

### Shape Interpolation

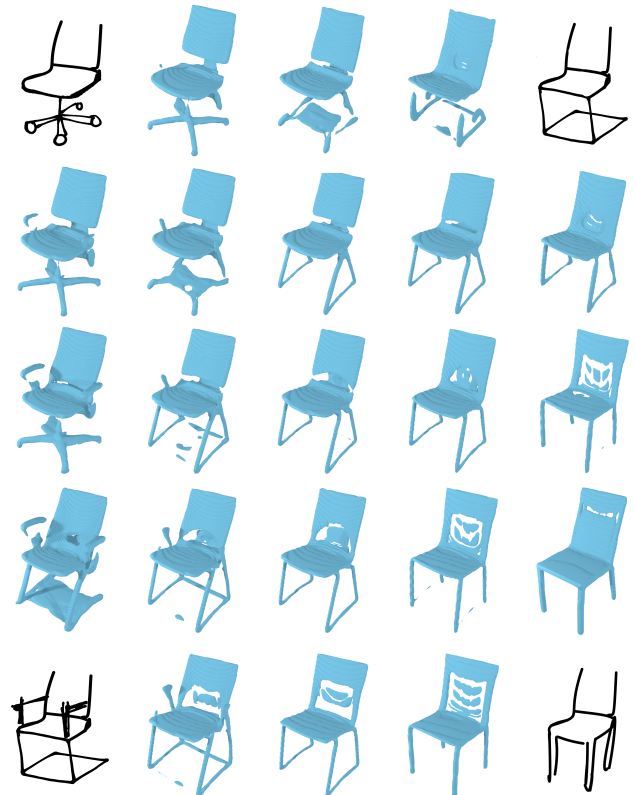

Figure S2. Interpolating shapes among four different sketches (at corners) from left to right and top to bottom.

**Generation of Shapes from Other Categories** In addition to chairs (Fig. 6), we perform sketch-based 3D generation of *airplanes*, *tables*, *rifles* and *cars*.

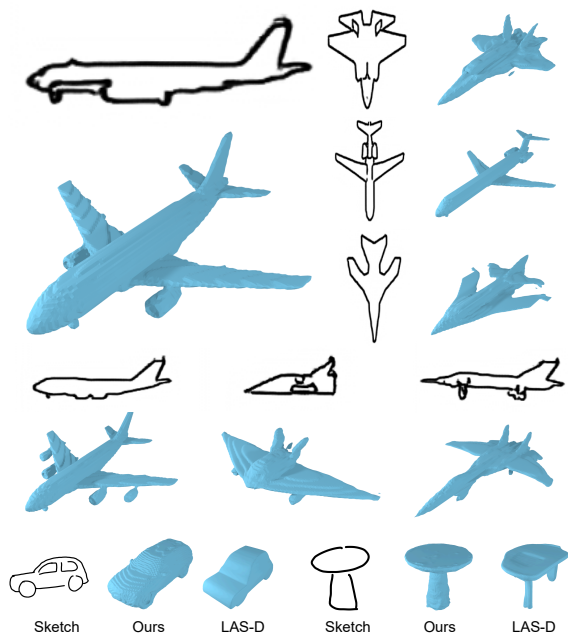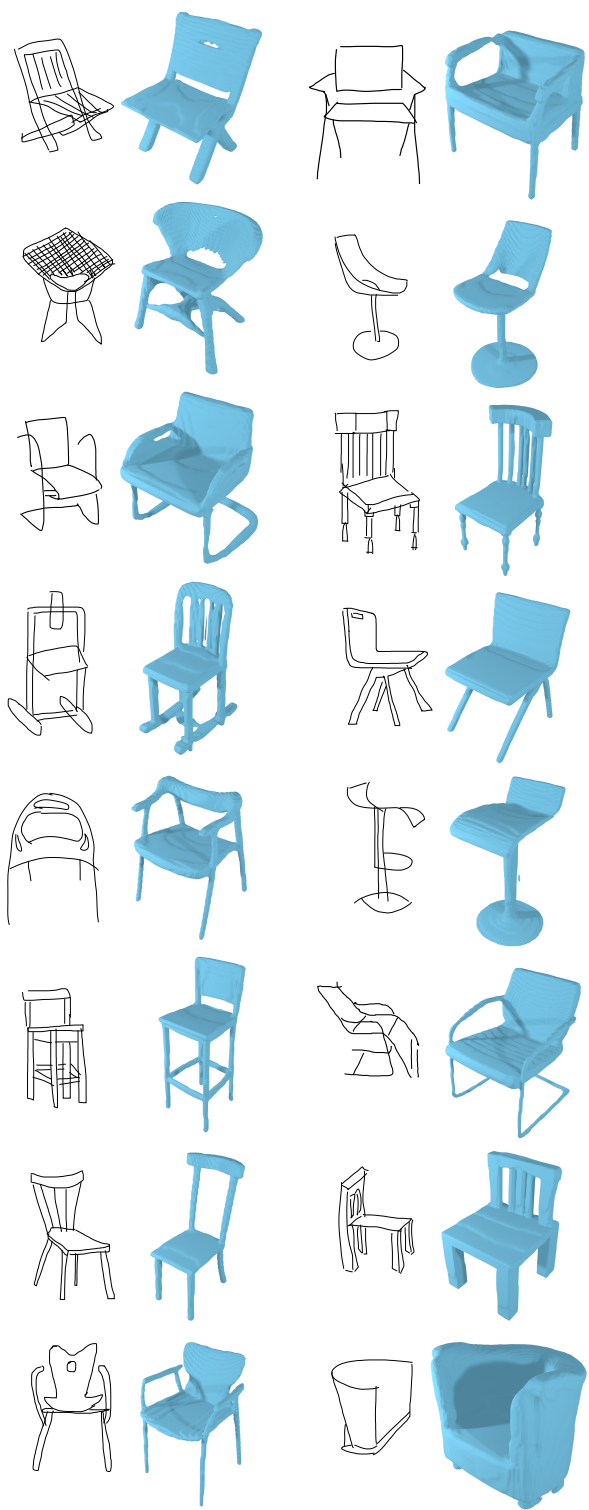

**Additional Qualitative Results (Chairs)**

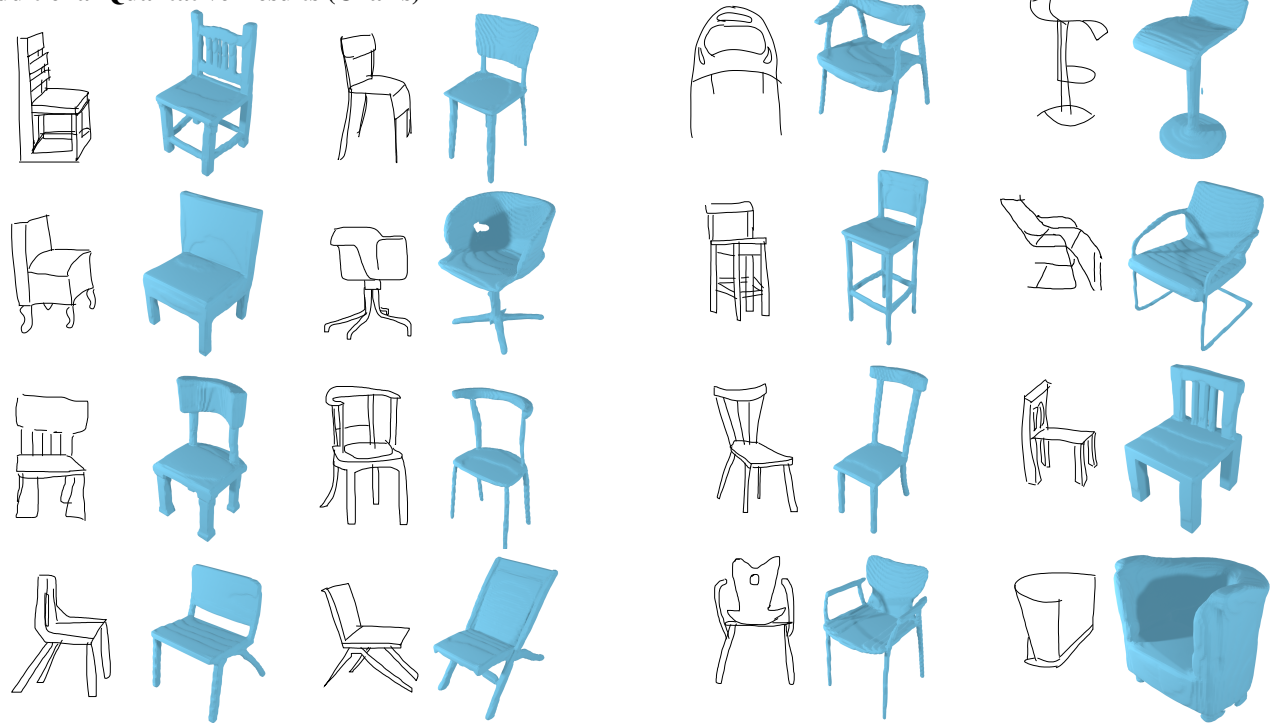

### Model Response to extreme inputs:

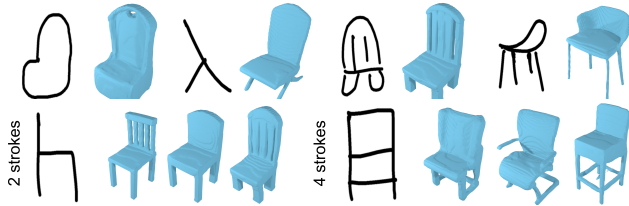

**User feedback for generated shapes:** We build an internal demo using Gradio for shape generation and editing, and ask 30 users to draw 10 sketches each on the demo-canvas and rate (*i*) the generated shapes on score from 1→5 (bad → excellent) based on how they match their expectation. We then ask the same users to edit their sketches and rate the edited shape based on (*ii*) localisation of edits, and (*iii*) quality of details added, using scores (1 → 5). Users reported a mean opinion score (MOS) of 4.17/4.00 for Ours/LAS-D generation quality, 4.91/4.35 for localisation, and 4.30/3.90 for quality of edits. We also obtained (*iv*) a satisfaction score of 4.37/3.55 for Ours/LAS-D from the same users based on generation speed, shape quality, consistency, and resolution by rating from 1 → 5. None of them were linked to the project to prevent conflicts.

### References

- [1] Amir Hertz, Or Perel, Raja Giryes, Olga Sorkine-Hornung, and Daniel Cohen-Or. Spaghetti: Editing implicit shapes through part aware generation. *ACM TOG*, 2022. 1
- [2] Anran Qi, Yulia Gryaditskaya, Jifei Song, Yongxin Yang, Yonggang Qi, Timothy M Hospedales, Tao Xiang, and Yi-Zhe Song. Toward fine-grained sketch-based 3d shape retrieval. *IEEE TIP*, 2021. 1
